# Supplementary material
Source: Springer Nature journal article supplement (https://www.springermedizin.de/resource/supplementary/40644_2014_23_MOESM1_ESM.pdf/25787146)

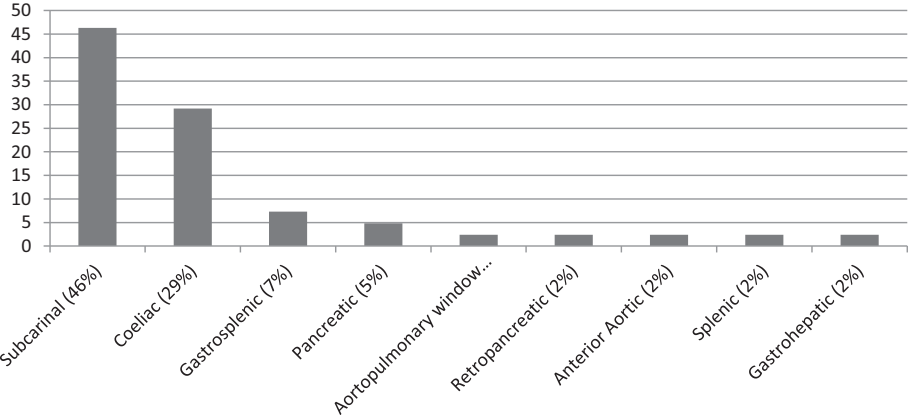

Supplement: MOESM1 [file 25787146]
